# Supplementary material
Source: publisher figshare collection journal article supplement (https://gsajournals.figshare.com/ndownloader/files/20187273)
Supplement: Supplementary file 1 [file 20187273]

**Table S1: Primer list**

| Name | Sequences (from 5’ to 3’) | Usage | Note |
| --- | --- | --- | --- |
| rbp45d_1 | TCGAGTGGTTGATAGCCGTG | Sequencing | Fragment amplification |
| rbp45d_2 | GATTAGGGAGGTGTTTCATG | Sequencing | Fragment amplification |
| rbp45d_3 | CATCGTGCGAGTCTTTCGAG | Sequencing |  |
| rbp45d_4 | TTTCCAATTCACAGCTCTCC | Sequencing |  |
| rbp45d_5 | CACAGATGCCTGGAACTGAG | Sequencing |  |
| rbp45d_6 | AGTGATGTCACCTGTACAAC | Sequencing |  |
| rbp45d_7 | GGATGGTTGGGTTACACAAG | Sequencing |  |
| rbp45A_F | TGGCAACAGTCTGCATAGAG | Genotyping |  |
| rbp45A_R | TGCTCTTCCGATGCAACCAG | Genotyping | + SAIL_LB (SAIL_569_G05) |
| rbp45B_F | TGAATTCGCATCTCATGCTG | Genotyping |  |
| rbp45B_R | TCCAGAAACTGTCACATCTG | Genotyping, RT-PCR | + SAIL_LB (SAIL_505_E03) |
| rbp45C_F | TTGAAGAGCTGAAAGGCAAG | Genotyping |  |
| rbp45C_R | AACGTCTTTGGTCTTACTGG | Genotyping, RT-PCR | +SALK_Lb (SALK_063484C) |
| RBP45A_RTF | ATGAGCAGATGCGTGCCATG | RT-PCR |  |
| RBP45A_RTR | GACGTTGCTGCTGATAGTTG | RT-PCR |  |
| RBP45B_RTR | GAATCCACAGCGCTTTCCAG | RT-PCR | +rbp45b_F |
| RBP45C_RTF | AAGTGCTTGCTCAGCACATG | RT-PCR | +rbp45C_R |
| dgcr14-1_F | TTATTCCGATGATACCCTCC | Genotyping | CAPS (*Bam*HI) |
| dgcr14-1_R | CAAGGAGAAAGCCATACTTC | Genotyping |  |
| dgcr14-2_F | GGTCTTGATGAATCACCCTTTATACCATG | Genotyping | dCAPS (*Nco*I) |
| dgcr14-2_R | TCCACTTCGATGAGGAGATG | Genotyping |  |
| CDKG2-3_F | GAGAAGTATAAACATGCTCC | Genotyping | CAPS (*Apo*I) |
| CDKG2-3_R | AAGAAAGTCCACCAGAATTC | Genotyping |  |
| IWS1-1 | GACTTTGTTAACACGAAGTC | Sequencing | Fragment amplification |
| IWS1-2 | CGTTTCCGTTTCAAGCAACC | Sequencing | Fragment amplification |
| IWS1-3 | CTCTTCCTACCAACCTTATC | Sequencing |  |
| IWS1-4 | TGGAGATTGGGATGGTGAAG | Sequencing |  |
| IWS1-5 | AGGGTGAGGATGAAGATGAG | Sequencing |  |
| IWS1-6 | TTTGTTCTGGCTTTGGCAGG | Sequencing |  |
| IWS1-7 | AACAGGTTTCTCAGGACCAG | Sequencing |  |
| IWS1_2_F | ATTACTCATTGTTTGTTGAAAAATCTGCA | Genotyping | dCAPS (*Pst*I) |
| IWS1_2_R | TCTTTTTACCTTGACCCGAC | Genotyping |  |
| IWS1_3 _F | AGCAACCCCATTGGACTTTTTGATCGGTC | Genotyping | dCAPS (*Ava*II) |
| IWS1_3 _R | GATTTTGAGCCAGTACAAGG | Genotyping |  |
| CBP80-1 | TCCGTTCAGAATAGAACACC | Sequencing | Fragment amplification |
| CBP80-2 | ATGCTAGGCAAGTCTACAAC | Sequencing | Fragment amplification |
| CBP80-3 | TGCACAGTGGTCGTCCATTC | Sequencing | Fragment amplification |
| CBP80-4 | ATAGTACGGTTGCTCAATTG | Sequencing | Fragment amplification |
| CBP80-5 | CTGAACAATTGCCTCATAAG | Sequencing |  |
| CBP80-6 | TCTAATCTGTACATCAAAGG | Sequencing |  |
| CBP80-7 | CAACCAACTTTGTTAGTCTG | Sequencing |  |
| CBP80-8 | CATATTCAATGTGCTAGTACC | Sequencing |  |
| CBP80-9 | TTTCAGATACTGCTGCTACC | Sequencing |  |
| CBP80-10 | TTGTGTTGGATCTTCCCAAG | Sequencing |  |
| CBP80-11 | GCAGGTGATGCTATTATCTC | Sequencing |  |
| CBP80-12 | TACTCAATCAAAACCTCCAC | Sequencing |  |
| cbp80-9_R | GAGCAGTAAAACCTATGCAC | Genotyping | +CBP80-11, CAPS (*Nco*I) |
| SmFa-1 | TGGTCAAAGAGTAGAAAGCC | Sequencing | Fragment amplification |
| SmFa-2 | GTTTGGTAATTGCTTGGTAC | Sequencing | Fragment amplification |
| SmFa-3 | GTTCATGTAGGAGTCAACAG | Sequencing |  |
| SmFa-4 | CATTCTTGAACAACTTGACC | Sequencing |  |
| SmFa-5 | CTACTTGCTACCACTTGATG | Sequencing |  |
| At2g14285_F | TCACGAATCAGAACTGATGG | Genotyping |  |
| At2g14285_R | GTAAGGCGAAGGGGACAATG | Genotyping | +SAIL_LB (SAIL_608_B05) |
| smfb_F | ATACCAGTAAACCCGAAACC | RT-PCR |  |
| smfb_R | AGATCGTGAAGGTAACATCC | RT-PCR |  |
| CWC16a-1 | TTTTGGGCTATACGAAACAC | Sequencing | Fragment amplification |
| CWC16a-2 | AAGACATTTACCGTACCGAC | Sequencing | Fragment amplification |
| CWC16a-3 | ACGTGAAATTCAAGAGCAAG | Sequencing |  |
| CWC16a-4 | GCTTGCTGATGGGTTTGTAG | Sequencing |  |
| CWC16a-5 | CTTTCCCTTCTCTGCAAAAG | Sequencing |  |
| CWC16a-6 | CGATCAACAAAATGTACACC | Sequencing |  |
| cwc16-1_F | TAAATTTCATACGTGCTTTTGTTTTCTGCA | Genotyping | dCAPS (*Pst*I) |
| cwc16-1_R | TGATTTCATTGCAAAGCTCC | Genotyping |  |
| SALK_054375_F | ACGACCAGAAAATCCGAAGG | Genotyping |  |
| SALK_054375_R | GGATGAAGATGTTTGGTGAG | Genotyping | +SALK LBb1 (SALK_054375) |
| SALK_152624_F | TGAATCCCGAGATACGTCTG | Genotyping |  |
| SALK_152624_R | AGAAGAAACAGGCGACATGG | Genotyping | +SALK LBb1 (SALK_15264 and SLAK_132471) |
| SALK_009736C_F | CTTTAATGACCCGAGCTACC | Genotyping |  |
| SALK_009736C_R | TCAATTACCTCGCCAATGAC | Genotyping | +SALK LBb1 (SALK_009736 |
| At1g17130_F | TTGATGTGCAGACGTATCTC | Genotyping |  |
| At1g17130_R | TACACTCACAGTAGCATGTC | Genotyping | + SAIL_LB (SAIL_527_G04) |
| Spreading5’ | AGGCTGCATCTTCAGGCATC | RT-PCR | GFP nascent RNA |
| egfp3’ | TTTACTTGTACAGCTCGTCC | RT-PCR | GFP nascent RNA |
| actin-f | GCCATCCAAGCTGTTCTCTC | RT-PCR | Actin control |
| actin-r | GGGCATCTGAATCTCTCAGC | RT-PCR | Actin control |
| SAIL_LB | TAGCATCTGAATTTCATAACCAATCTCGATACAC | Genotyping |  |
| SALK_LBb1 | GCGTGGACCGCTTGCTGCAACT | Genotyping |  |
